# Supplementary material for: RETRACTED: PAK3 downregulation induces cognitive impairment following cranial irradiation
Source: eLife journal article supplement (doi:10.7554/elife.89221), 2023-09-12
Supplement: supp1 [file elife-89221-supp1-v1.docx]

**Supplementary File 1**

**PAK3 downregulation induces cognitive impairment following cranial irradiation**

**Haksoo Lee, Hyunkoo Kang, Changjong Moon and BuHyun Youn**

**Supplemental Table**

**S1 Table.** Primers for determining levels of gene expression

**S1 Table. Primers for determining levels of gene expression**

| Gene name | Forward primer | Reverse primer |
| --- | --- | --- |
| *PAK3* (mouse)  *PAK3* (human)  *GAPDH* (mouse)  *GAPDH* (human)  *SOX2*  *NESTIN*  *PAX6*  *NeuN*  *PSD-95*  *IBA-1*  *GFAP*  *miR-206-3p*  *miR-1a-3p*  *miR-26a-5p* | 5′- TTGGATAACGAAGAAAAACCCCC -3′  5’- CAGCAGAAAGGGAACTATAGACACAT -3’  5’- GCAGTGTCATTAGCTGAT –3’  5’- GGACGGGACGCGGTGCAG -3’  5’- TCCCCAGATACAATGGAC -3’  5’- AGCCCTGACCACTCCAGTTTAG -3’  5’- GCAACAACAGCAGCACAAAAA -3’  5'- GGCGACCTACAGCATTGGA -3'  5'- CGACAGCATCCTGTTTGTAAATG -3'  5'- CTGAAGGCCCAGCAGGAA -3'  5'- CGGCTGCTTTTCCCTAAGC -3'  5’- GCAGTGGAATGTAAGGAAGT -3’  5’- CGCAGTGGAATGTAAAGAAG -3’  5’- GCAGTTCAAGTAATCCAGGATAG -3’ | 5′- GGGCACATCTGTGAGCCATAG -3′  5’- GGCAAGCATAAAGCCTATGGAA -3’  5′- CAGGACTTGCAATGTTGCTTGAG -3′  5′- CTTATAAGGCGCGGAACCGAAA -3′  5′- TCCATGCTGTTTCTTACTCTCC -3′  5′- CCCTCTATGGCTGTTTCTTTCTCT -3′  5’ - GGTTGTCACAGCTTCTGTCAAGA -3’  5'- CATGGTCCGAGAAGGAAACG -3'  5'- TCCACCGCCGCTGAGT -3'  5'- TTTGGGATCGTCTAGGAATTGC -3'  5'- GGGTACATTTTGTGTGTGAGTAAGAAG -3'  Universal 5’ - AGTGCAGGGTCCGAGGTATTC -3’  Universal  Universal |

This table provides a comprehensive list of the primers used in this study. For each gene and microRNA, the specific forward and reverse primer sequences are detailed. The sequences are presented in a 5' to 3' direction.
